# Supplementary material for: A label-free turn ON–OFF chemiluminescence strategy for lysozyme detection by target-triggered Cu2−xSe aggregation
Source: Royal Society of Chemistry journal article supplement (doi:10.1039/c9ay01288e), 2019-01-01
Supplement: c9ay01288e1.pdf [file c9ay01288e1.pdf]

# A label-free turn on-off chemiluminescent strategy for lysozyme detection by target-triggered $\text{Cu}_{2-x}\text{Se}$ aggregation

Hong Yan Zou <sup>a</sup>, Fang Fang Zhang <sup>b</sup>, Qing Juan Guo <sup>a</sup>, Tong Yang <sup>a</sup>, Cheng Zhi Huang <sup>a, b, \*</sup>

<sup>a</sup> Key Laboratory of Luminescent and Real-Time Analytical Chemistry (Southwest University), Ministry of Education, College of Pharmaceutical Sciences, Southwest University, Chongqing 400715, China. E-mail: chengzhi@swu.edu.cn, Tel: (+86) 23 68254059, Fax: (+86) 23 68367257.

<sup>b</sup> Chongqing Key Laboratory of Biomedical Analysis (Southwest University), Chongqing Science & Technology Commission, College of Chemistry and Chemical Engineering, Southwest University, Chongqing 400715, China.

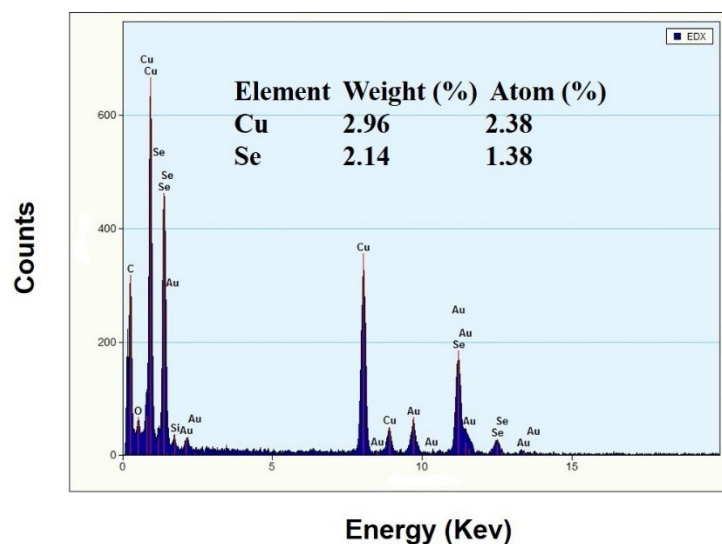

**Fig. S1** EDX spectrum of the  $\text{Cu}_{2-x}\text{Se}$  NPs. Elemental Au mainly comes from the sample preparation for the SEM measurement.

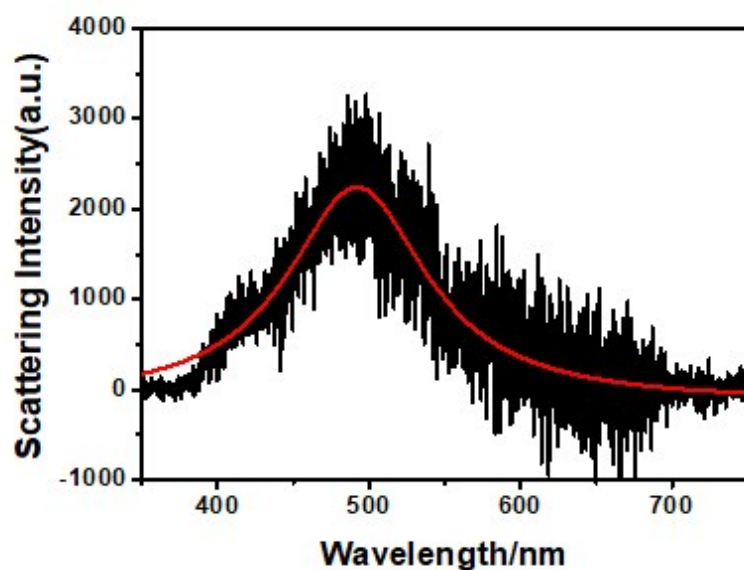

**Fig. S2** The scattering spectrum of a single  $\text{Cu}_{2-x}\text{Se}$  NPs. The black dots represent the raw data; the red line was the Gaussian fitted curve.

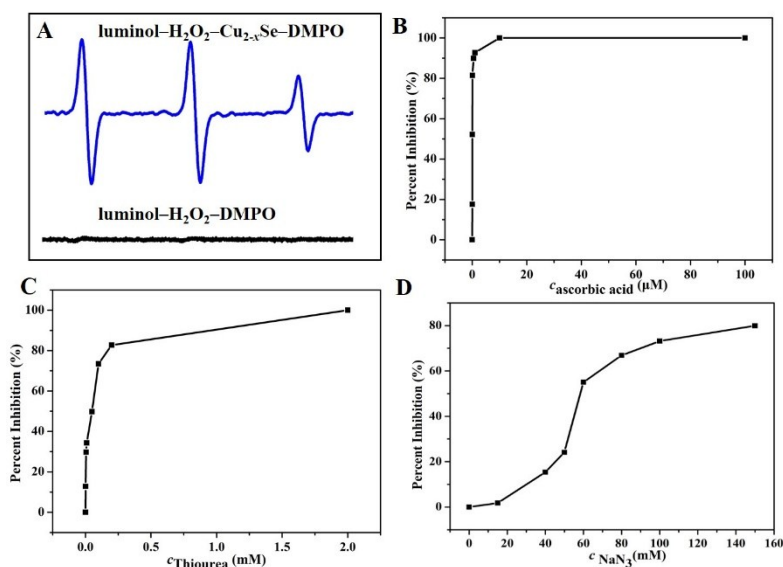

**Fig. S3** (A) ESR spectra of DMPO- $\text{OH}\cdot$  adduct; Effects of the different radical scavengers of (B) ascorbic acid, (C) thiourea and (D)  $\text{NaN}_3$  on the CL intensity of luminol (5 mM)- $\text{H}_2\text{O}_2$  (1mM)- $\text{Cu}_{2-x}\text{Se}$  (10  $\mu\text{g}/\text{mL}$ ) system,  $\text{pH}=7.3$ .

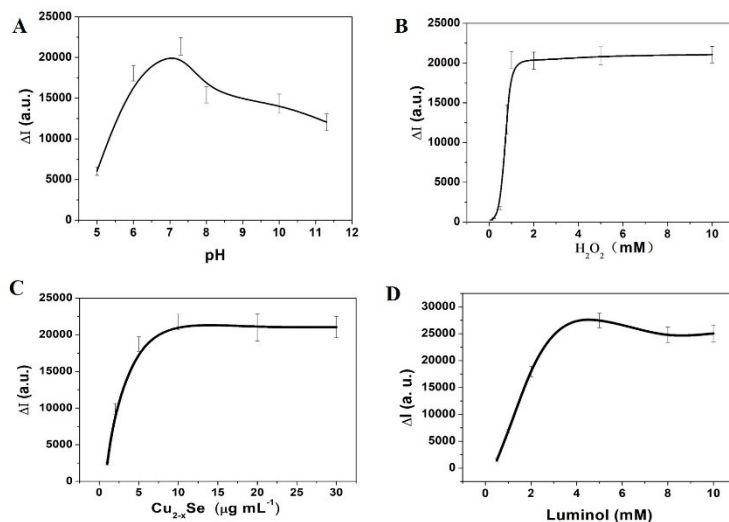

**Fig. S4** Optimization of the experiment conditions (A) pH: luminol 5 mM,  $Cu_{2-x}Se$  NPs 10  $\mu g/mL$ ,  $H_2O_2$  1 mM (B) concentration of  $Cu_{2-x}Se$  NPs: luminol 5 mM, pH, 7.3,  $H_2O_2$  1 mM (C) concentration of  $H_2O_2$ : luminol 5 mM,  $Cu_{2-x}Se$  NPs 10  $\mu g/mL$ , pH, 7.3. (D) concentration of luminol:  $H_2O_2$  1 mM,  $Cu_{2-x}Se$  NPs 10  $\mu g/mL$ , pH, 7.3.

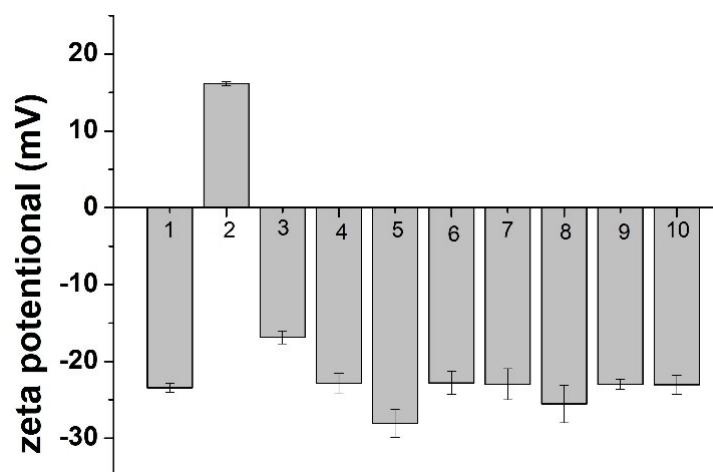

**Fig. S5** Zeta potential of  $Cu_{2-x}Se$  NPs and in presence of different proteins. 1,  $Cu_{2-x}Se$  NPs; 2,  $Cu_{2-x}Se$  NPs + Lys (1 mg/mL); 3,  $Cu_{2-x}Se$  NPs + pepsin (1 mg/mL); 4,  $Cu_{2-x}Se$  NPs +thrombin (1 mg/mL); 5,  $Cu_{2-x}Se$  NPs +hemoglobin (1 mg/mL); 6,  $Cu_{2-x}Se$  NPs + horse radish peroxidase (HRP) (1 mg/mL); 7,  $Cu_{2-x}Se$  NPs + BSA (1 mg/mL); 8,  $Cu_{2-x}Se$  NPs + immunoglobulin G (1 mg/mL); 9,  $Cu_{2-x}Se$  NPs + proteinase K (0.1 mg/mL); 10,  $Cu_{2-x}Se$  NPs + papain (1 mg/mL).
